# Supplementary material for: From By-Products to Fertilizer: Chemical Characterization Using UPLC-QToF-MS via Suspect and Non-Target Screening Strategies
Source: Molecules. 2022 May 29;27(11):3498. doi: 10.3390/molecules27113498 (PMC9182003; doi:10.3390/molecules27113498)
Supplement: Supplementary file 1 [file molecules-27-03498-s001.zip › molecules-1733135-supplementary.pdf]

### Supplementary Materials

Typical chromatograms of the compounds identified in both raw materials and final products are illustrated in figures S1-S6. Additionally, the temperature change versus time of composting for the onion-based and mushroom-based final products are depicted in figure S7.

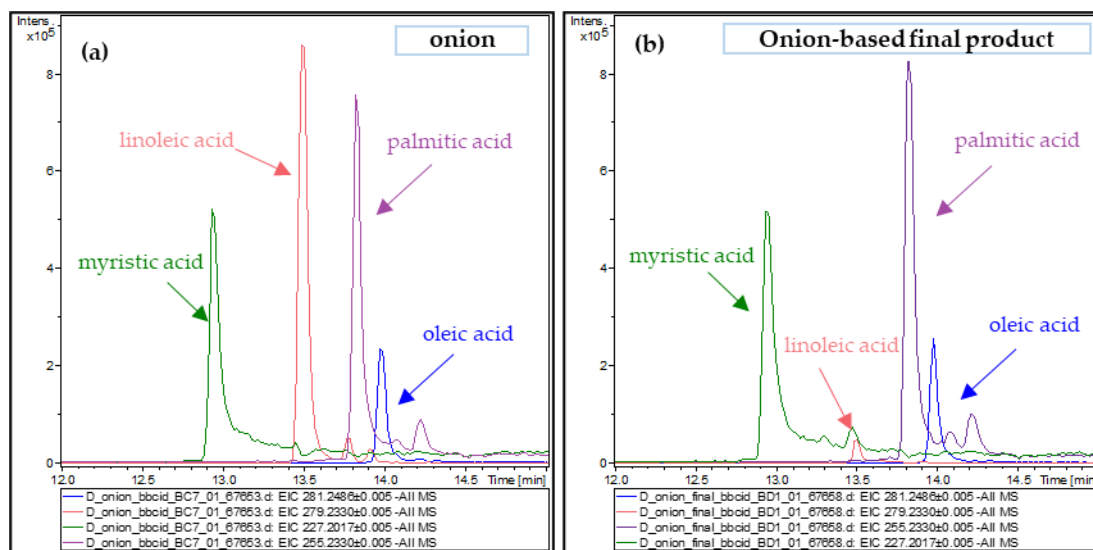

**Figure S1:** Typical chromatograms of myristic acid ( $227.2017 \pm 0.005$  Da), linoleic acid ( $279.2330 \pm 0.005$  Da), palmitic acid ( $255.2330 \pm 0.005$  Da) and oleic acid ( $281.2486 \pm 0.005$  Da) for (a) the onion raw material and (b) the onion-based final product.

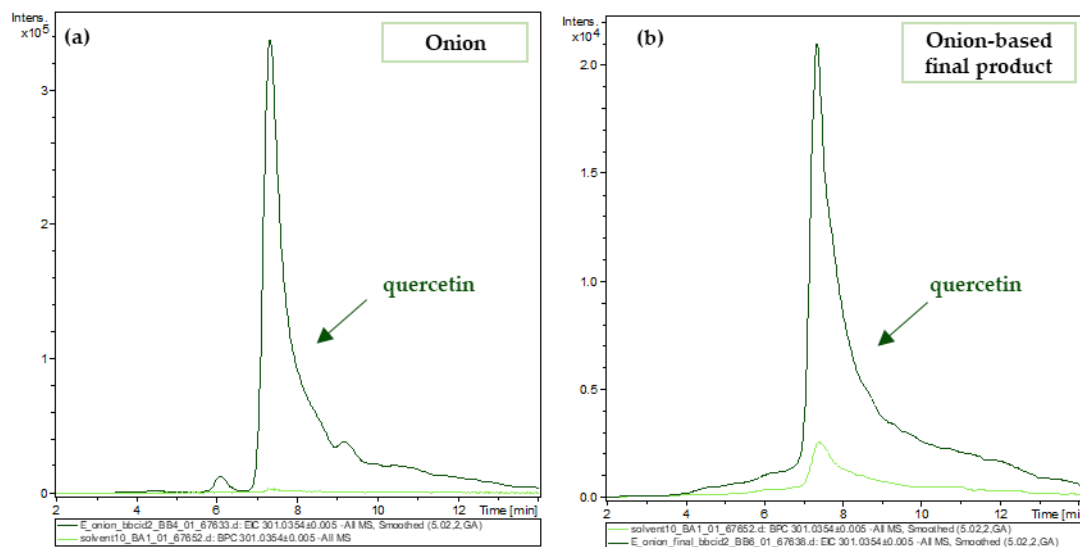

**Figure S2:** Typical chromatograms of quercetin ( $301.0354 \pm 0.005$  Da) for (a) onion raw material and (b) the onion-based final product.

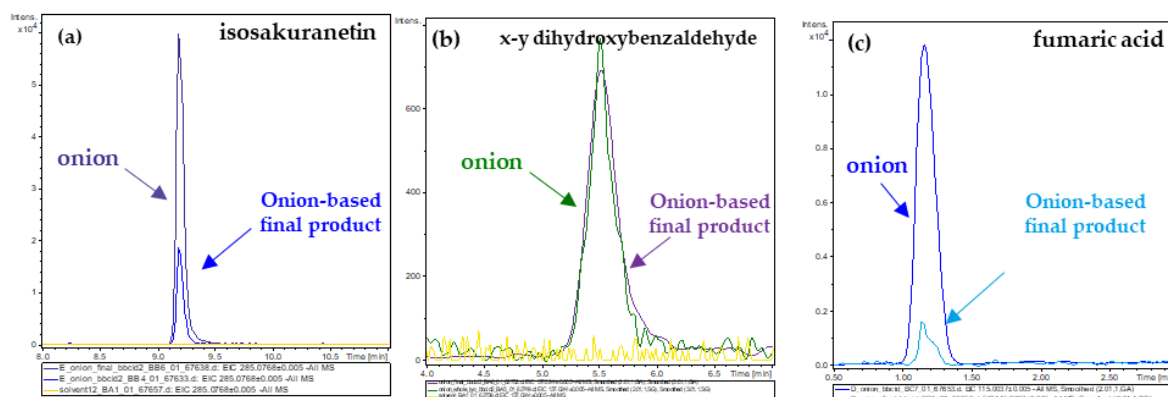

**Figure S3:** Typical chromatograms of (a) isosakuranetin ( $285.0768 \pm 0.005$  Da) (b) x-y dihydroxybenzaldehyde ( $137.0244 \pm 0.005$  Da) (c) fumaric acid ( $115.0037 \pm 0.005$  Da) for the raw material and its corresponding final product.

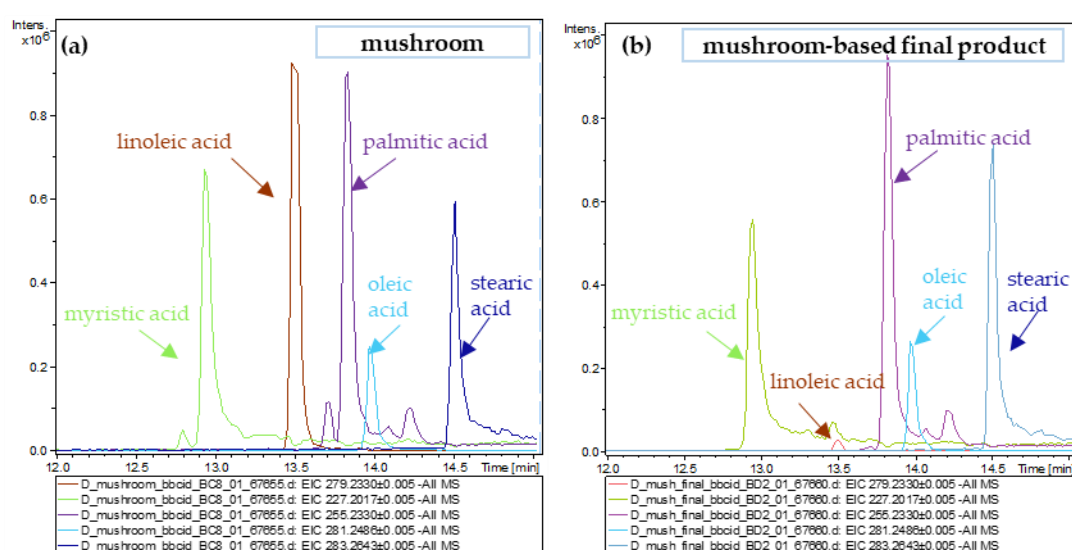

**Figure S4:** Typical chromatograms of the myristic acid ( $227.2017 \pm 0.005$  Da), linoleic acid ( $279.2330 \pm 0.005$  Da), palmitic acid ( $255.2330 \pm 0.005$  Da), oleic acid ( $281.2486 \pm 0.005$  Da), stearic acid ( $283.2643 \pm 0.005$  Da) for (a) the mushroom raw material and (b) mushroom-based final product.

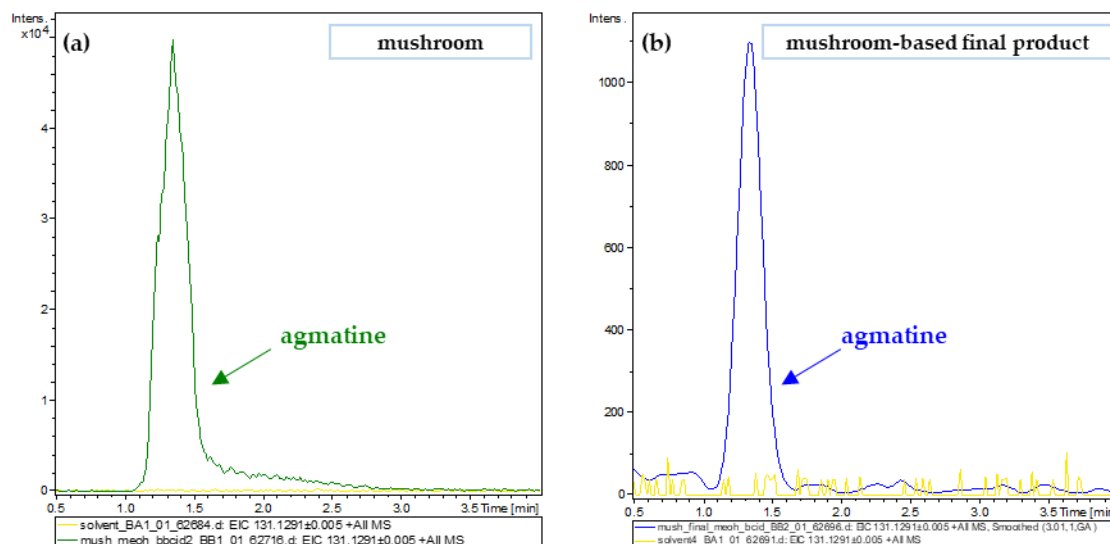

**Figure S5:** Typical chromatograms of the agmatine ( $131.1291 \pm 0.005$  Da) for (a) the mushroom raw material and (b) the mushroom-based final product.

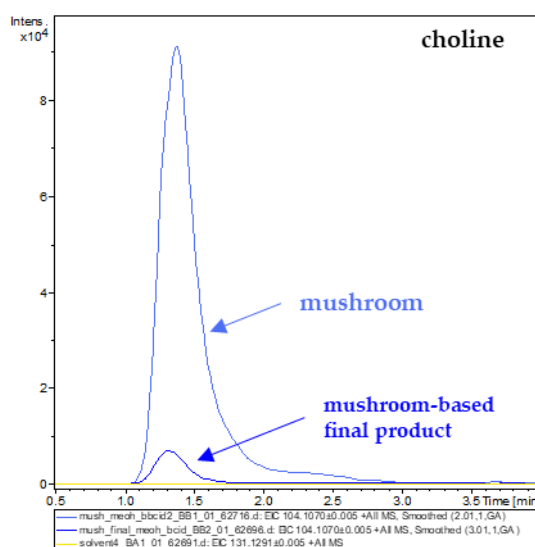

**Figure S6:** Typical chromatograms of choline ( $104.1070 \pm 0.005$  Da) for the mushroom raw material and the mushroom-based final product.

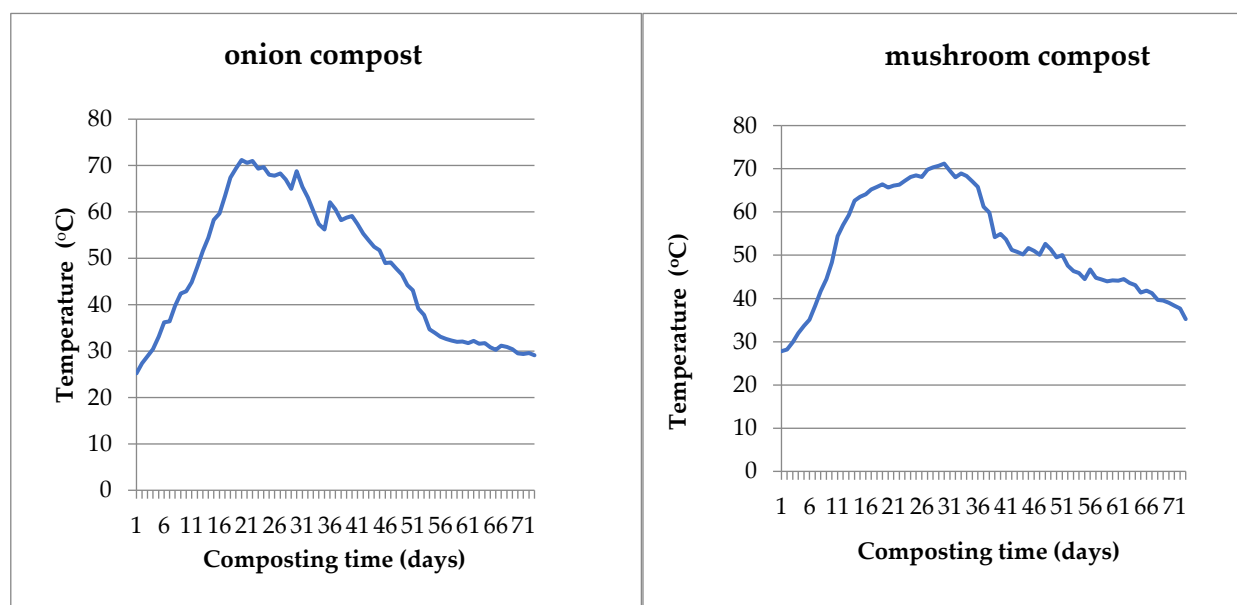

**Figure S7.** Temperature versus time of composting (a) for the onion-based final product (b) for the mushroom-based final product

The overall results from the analysis of pH, conductivity, nitrogen content, organic carbon, organic matter and the elemental analysis are presented on Table S1.

**Table S1.** Results of analysis in onion-based and mushroom-based final product.

| Parameter                           | Onion-based final product | Mushroom-based final product |
|-------------------------------------|---------------------------|------------------------------|
| pH                                  | 8.44                      | 8.34                         |
| Conductivity (mS cm <sup>-1</sup> ) | 10.1                      | 10.9                         |
| Nitrogen (g/100g)                   | 0.0149                    | 0.0029                       |
| Organic carbon (g/100g)             | 0.162                     | 0.256                        |
| Organic matter                      | 0.481                     | 0.759                        |
| P (mg/kg)                           | 24.1                      | 19.0                         |
| Zn (mg/kg)                          | 18.7                      | 18.1                         |
| Fe (mg/kg)                          | 14.4                      | 15                           |
| Cu (mg/kg)                          | 1.08                      | 0.92                         |
| Ni (mg/kg)                          | 0.32                      | 0.32                         |
| B (mg/kg)                           | 0.76                      | <0.2                         |
| Mn (mg/kg)                          | 0.72                      | 0.8                          |
| Al (mg/kg)                          | 4.36                      | 4.2                          |
| Ba (mg/kg)                          | <0.4                      | <0.4                         |
| Cd (mg/kg)                          | <0.2                      | <0.2                         |
| V (mg/kg)                           | <0.2                      | <0.2                         |
| Pb (mg/kg)                          | <0.4                      | <0.4                         |
| Mo (mg/kg)                          | <0.2                      | <0.2                         |
| Cr (mg/kg)                          | <0.04                     | <0.04                        |
